# Supplementary material
Source: publisher figshare collection journal article supplement (https://rs.figshare.com/ndownloader/files/15087686)
Supplement: Supplementary file 1 [file 15087686]

**Supplementary methods:**

**
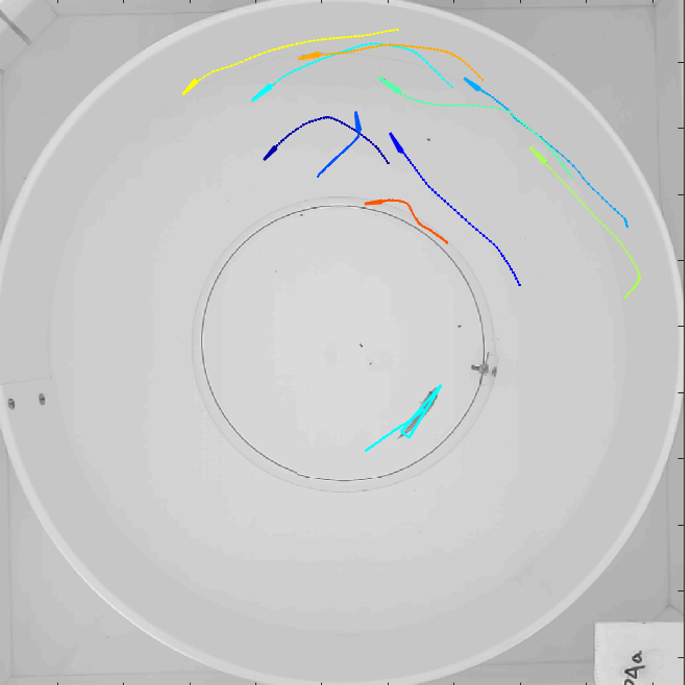
**

**Figure S1:** Example of experimental setup and video tracking from predator 4 trial.

**Table S1:** Results from individual mixed effect models tested against each measure of prey behaviour when predators were either inactive or active. Individual nested within trial was included in each model as a random effect.

|  | Predator State | Fixed Effects | Value | Std. Error | Conf. Int. | | t-value | p-value |
| --- | --- | --- | --- | --- | --- | --- | --- | --- |
| Lower | Upper |
| Median Speed (mm) | Inactive | Intercept | 0.00 | 0.06 | -0.11 | 0.12 | 0.08 | 0.94 |
| Angle | -1.31 | 0.67 | -2.63 | 0.01 | -1.94 | 0.05 |
| Angle2 | -10.51 | 0.68 | -11.84 | -9.19 | -15.53 | < 0.001 |
| Angle3 | 3.96 | 0.67 | 2.64 | 5.27 | 5.90 | < 0.001 |
| Active | Intercept | -0.02 | 0.06 | -0.13 | 0.09 | -0.32 | 0.75 |
| Angle | -4.42 | 0.64 | -5.68 | -3.16 | -6.88 | < 0.001 |
| Angle2 | -2.98 | 0.64 | -4.23 | -1.73 | -4.66 | < 0.001 |
| Angle3 | -0.06 | 0.64 | -1.31 | 1.19 | -0.09 | 0.93 |
| Median NND (mm) | Inactive | Intercept | 0.01 | 0.05 | -0.08 | 0.10 | 0.24 | 0.81 |
| Angle | -5.70 | 0.84 | -7.35 | -4.05 | -6.77 | < 0.001 |
| Angle2 | -2.56 | 0.85 | -4.22 | -0.90 | -3.02 | 0.00 |
| Angle3 | 4.85 | 0.84 | 3.21 | 6.50 | 5.78 | < 0.001 |
| Active | Intercept | 0.00 | 0.04 | -0.09 | 0.08 | -0.09 | 0.93 |
| Angle | 3.44 | 0.80 | 1.88 | 5.01 | 4.31 | < 0.001 |
| Angle2 | -4.10 | 0.80 | -5.66 | -2.54 | -5.15 | < 0.001 |
| Angle3 | -0.43 | 0.79 | -1.98 | 1.13 | -0.54 | 0.59 |
| Median Acceleration (mm/s2) | Inactive | Intercept | -0.05 | 0.06 | -0.16 | 0.07 | -0.78 | 0.44 |
| Angle | -0.50 | 0.66 | -1.78 | 0.79 | -0.75 | 0.45 |
| Angle2 | -1.60 | 0.66 | -2.89 | -0.30 | -2.42 | 0.02 |
| Active | Intercept | 0.04 | 0.06 | -0.07 | 0.15 | 0.70 | 0.48 |
| Angle | -7.53 | 0.65 | -8.79 | -6.26 | -11.66 | < 0.001 |
| Angle2 | 1.07 | 0.64 | -0.19 | 2.33 | 1.67 | 0.09 |

**Trajectory Analysis:**

Both predator and prey coordinates were smoothed using a moving average spanning 208ms (5 frames of video) and converted into real-world coordinates using a known reference length within the videos.

**Identifying Predator States:**

Histograms of both the predators’ instantaneous speeds (Fig. S2a) and turning speeds (Fig.S2b) were bimodal, indicating the presence of two behavioural states. Plotting predators’ instantaneous speeds versus their instantaneous turning speeds revealed more detail of these states (Fig. S2c). One state was associated with higher speeds and turning speeds (state 1), which we call the ‘active state’. The other was associated with relatively lower speeds and turning speeds (state 2), which we call the ‘inactive state’. We take the projection of a predator’s speed and turning speed along the line joining the centroids of the active and inactive state (denoted by an arrow in Fig. S2c). We define the halfway point between the two to be the boundary between these two states (as shown by the segment halfway along the arrow), and determined the occasions when each predator was in the ‘active state – state 1’ (top right region of the Fig 2c) or an ‘inactive state – state 0’ (bottom left region of Fig. S2c). Because measurements of instantaneous speed and turning speed were noisy, we attempted to identify more contiguous periods when a predator was in the active state. This was done by forcing small periods of inactivity of less than 2 seconds which are found between active periods, to also be marked as active. Results are detailed in Figure S3.


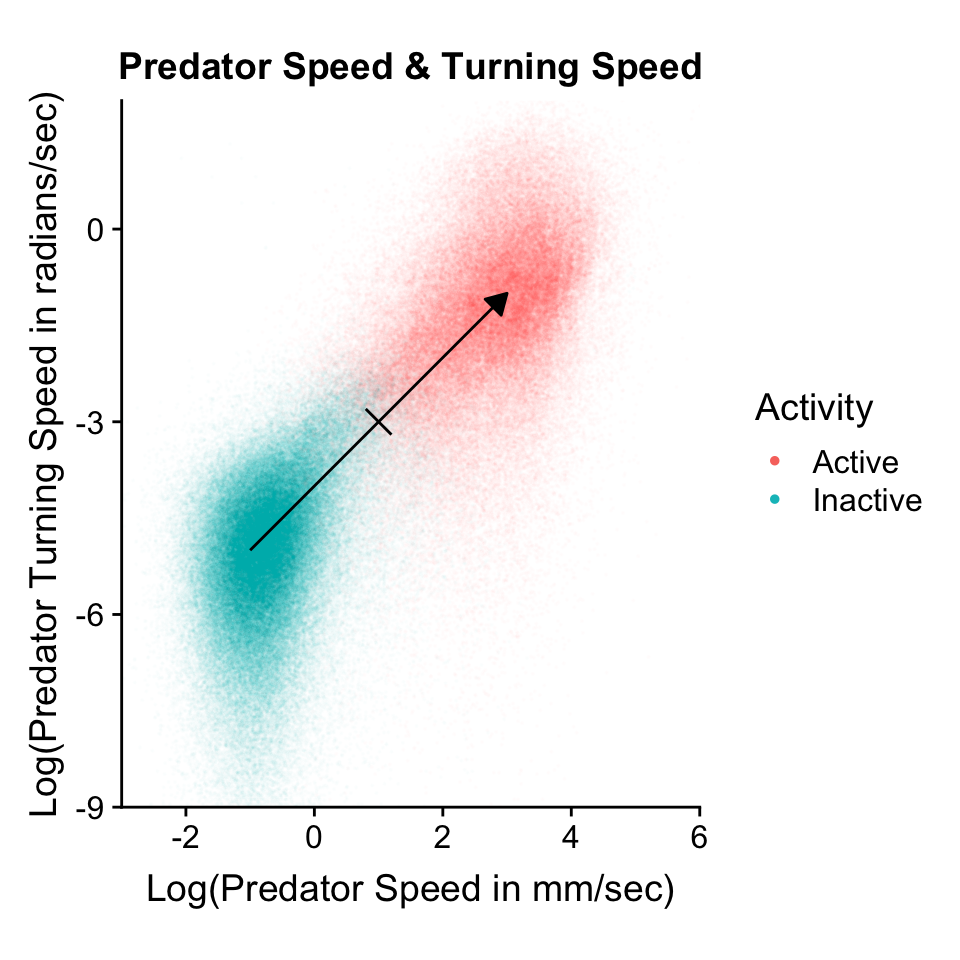


C
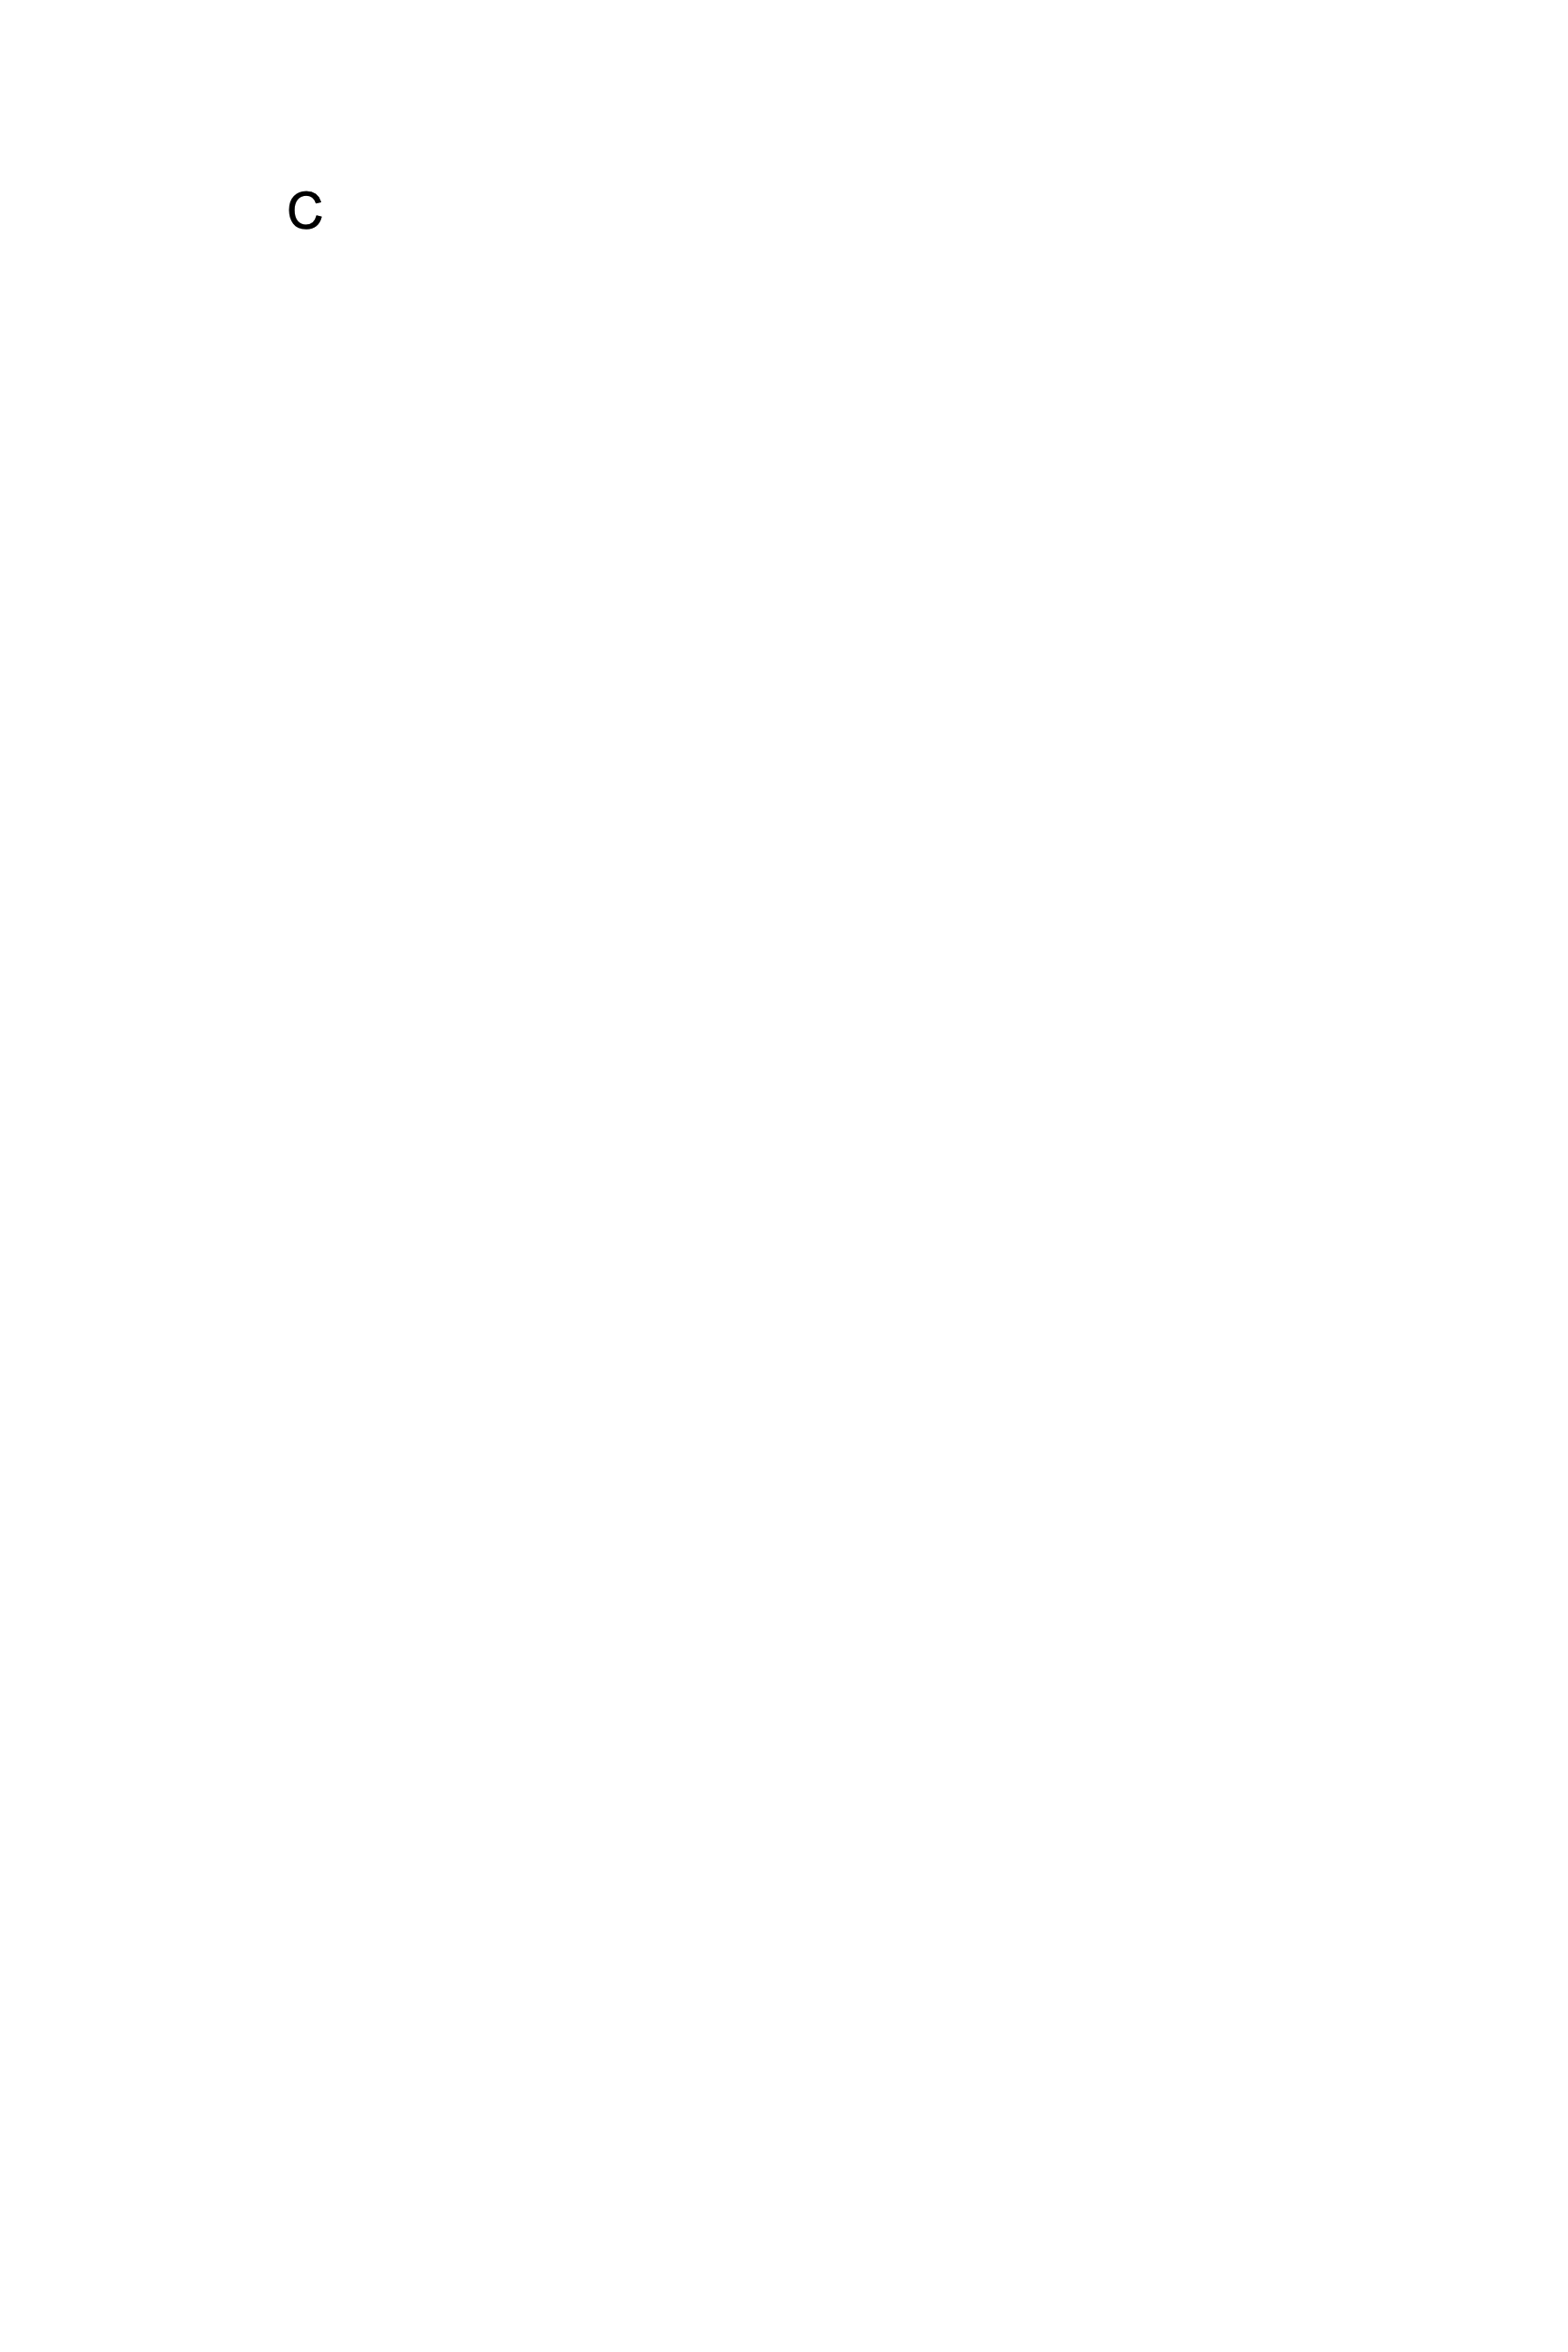


A
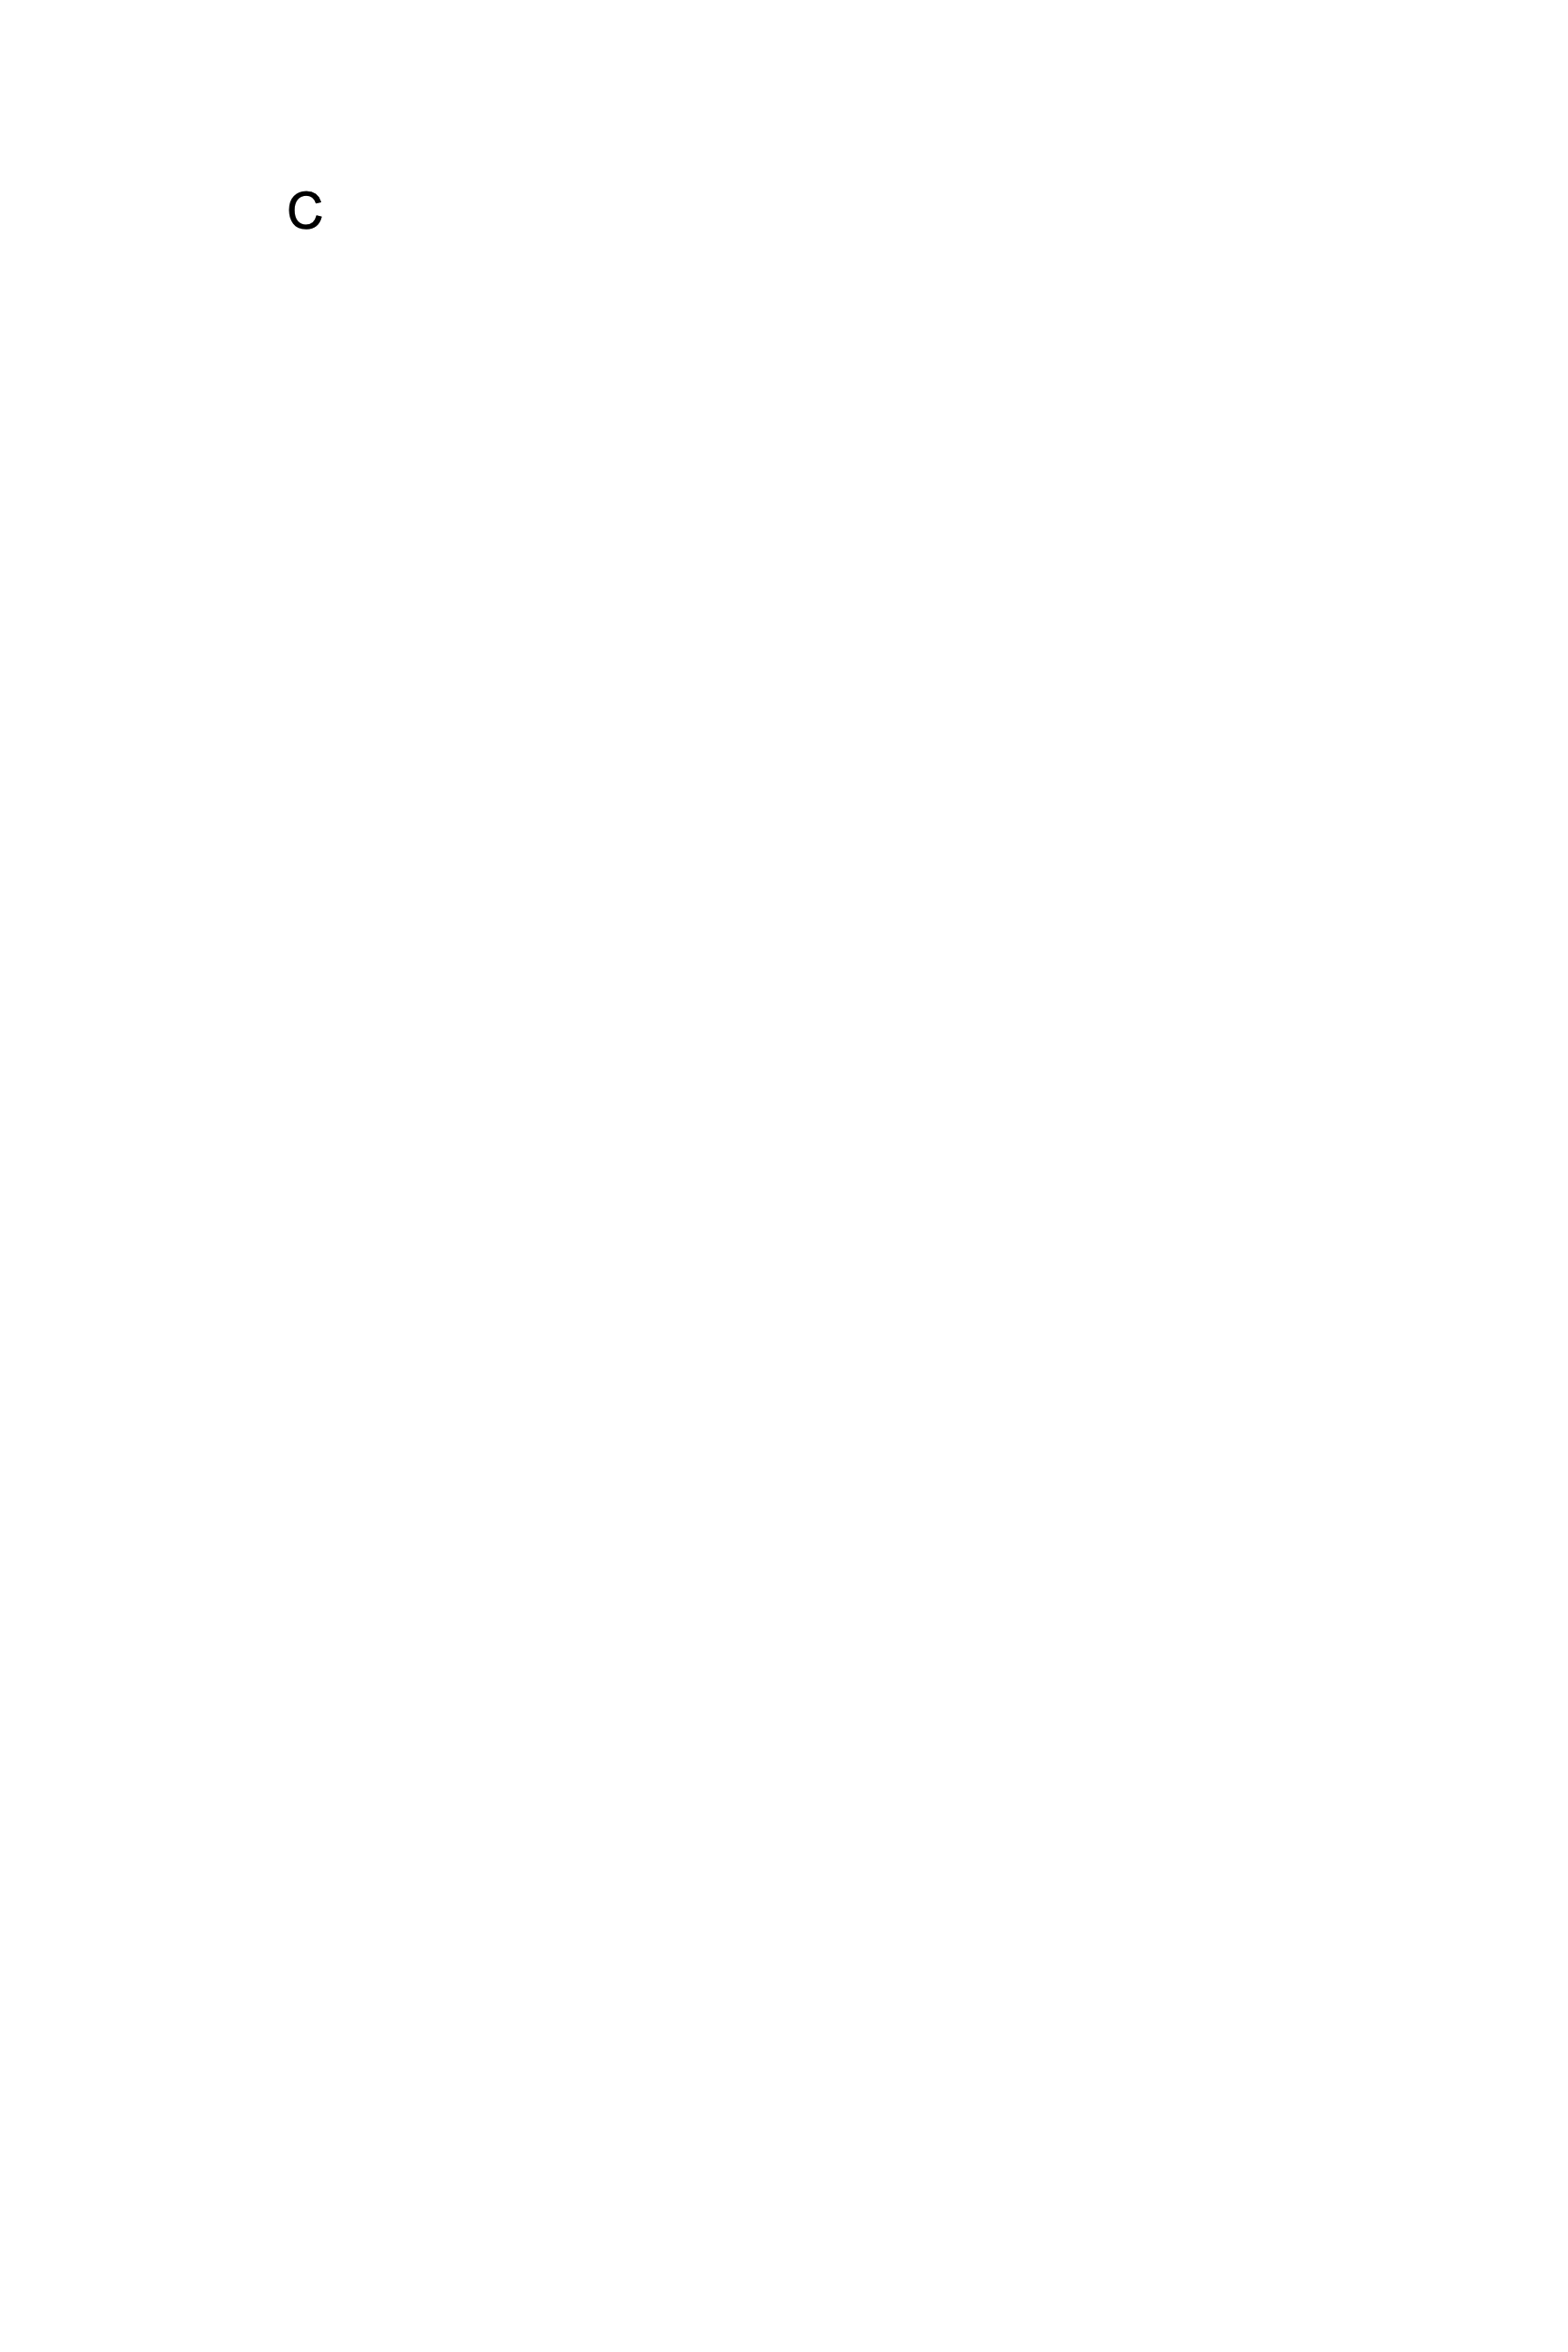


B
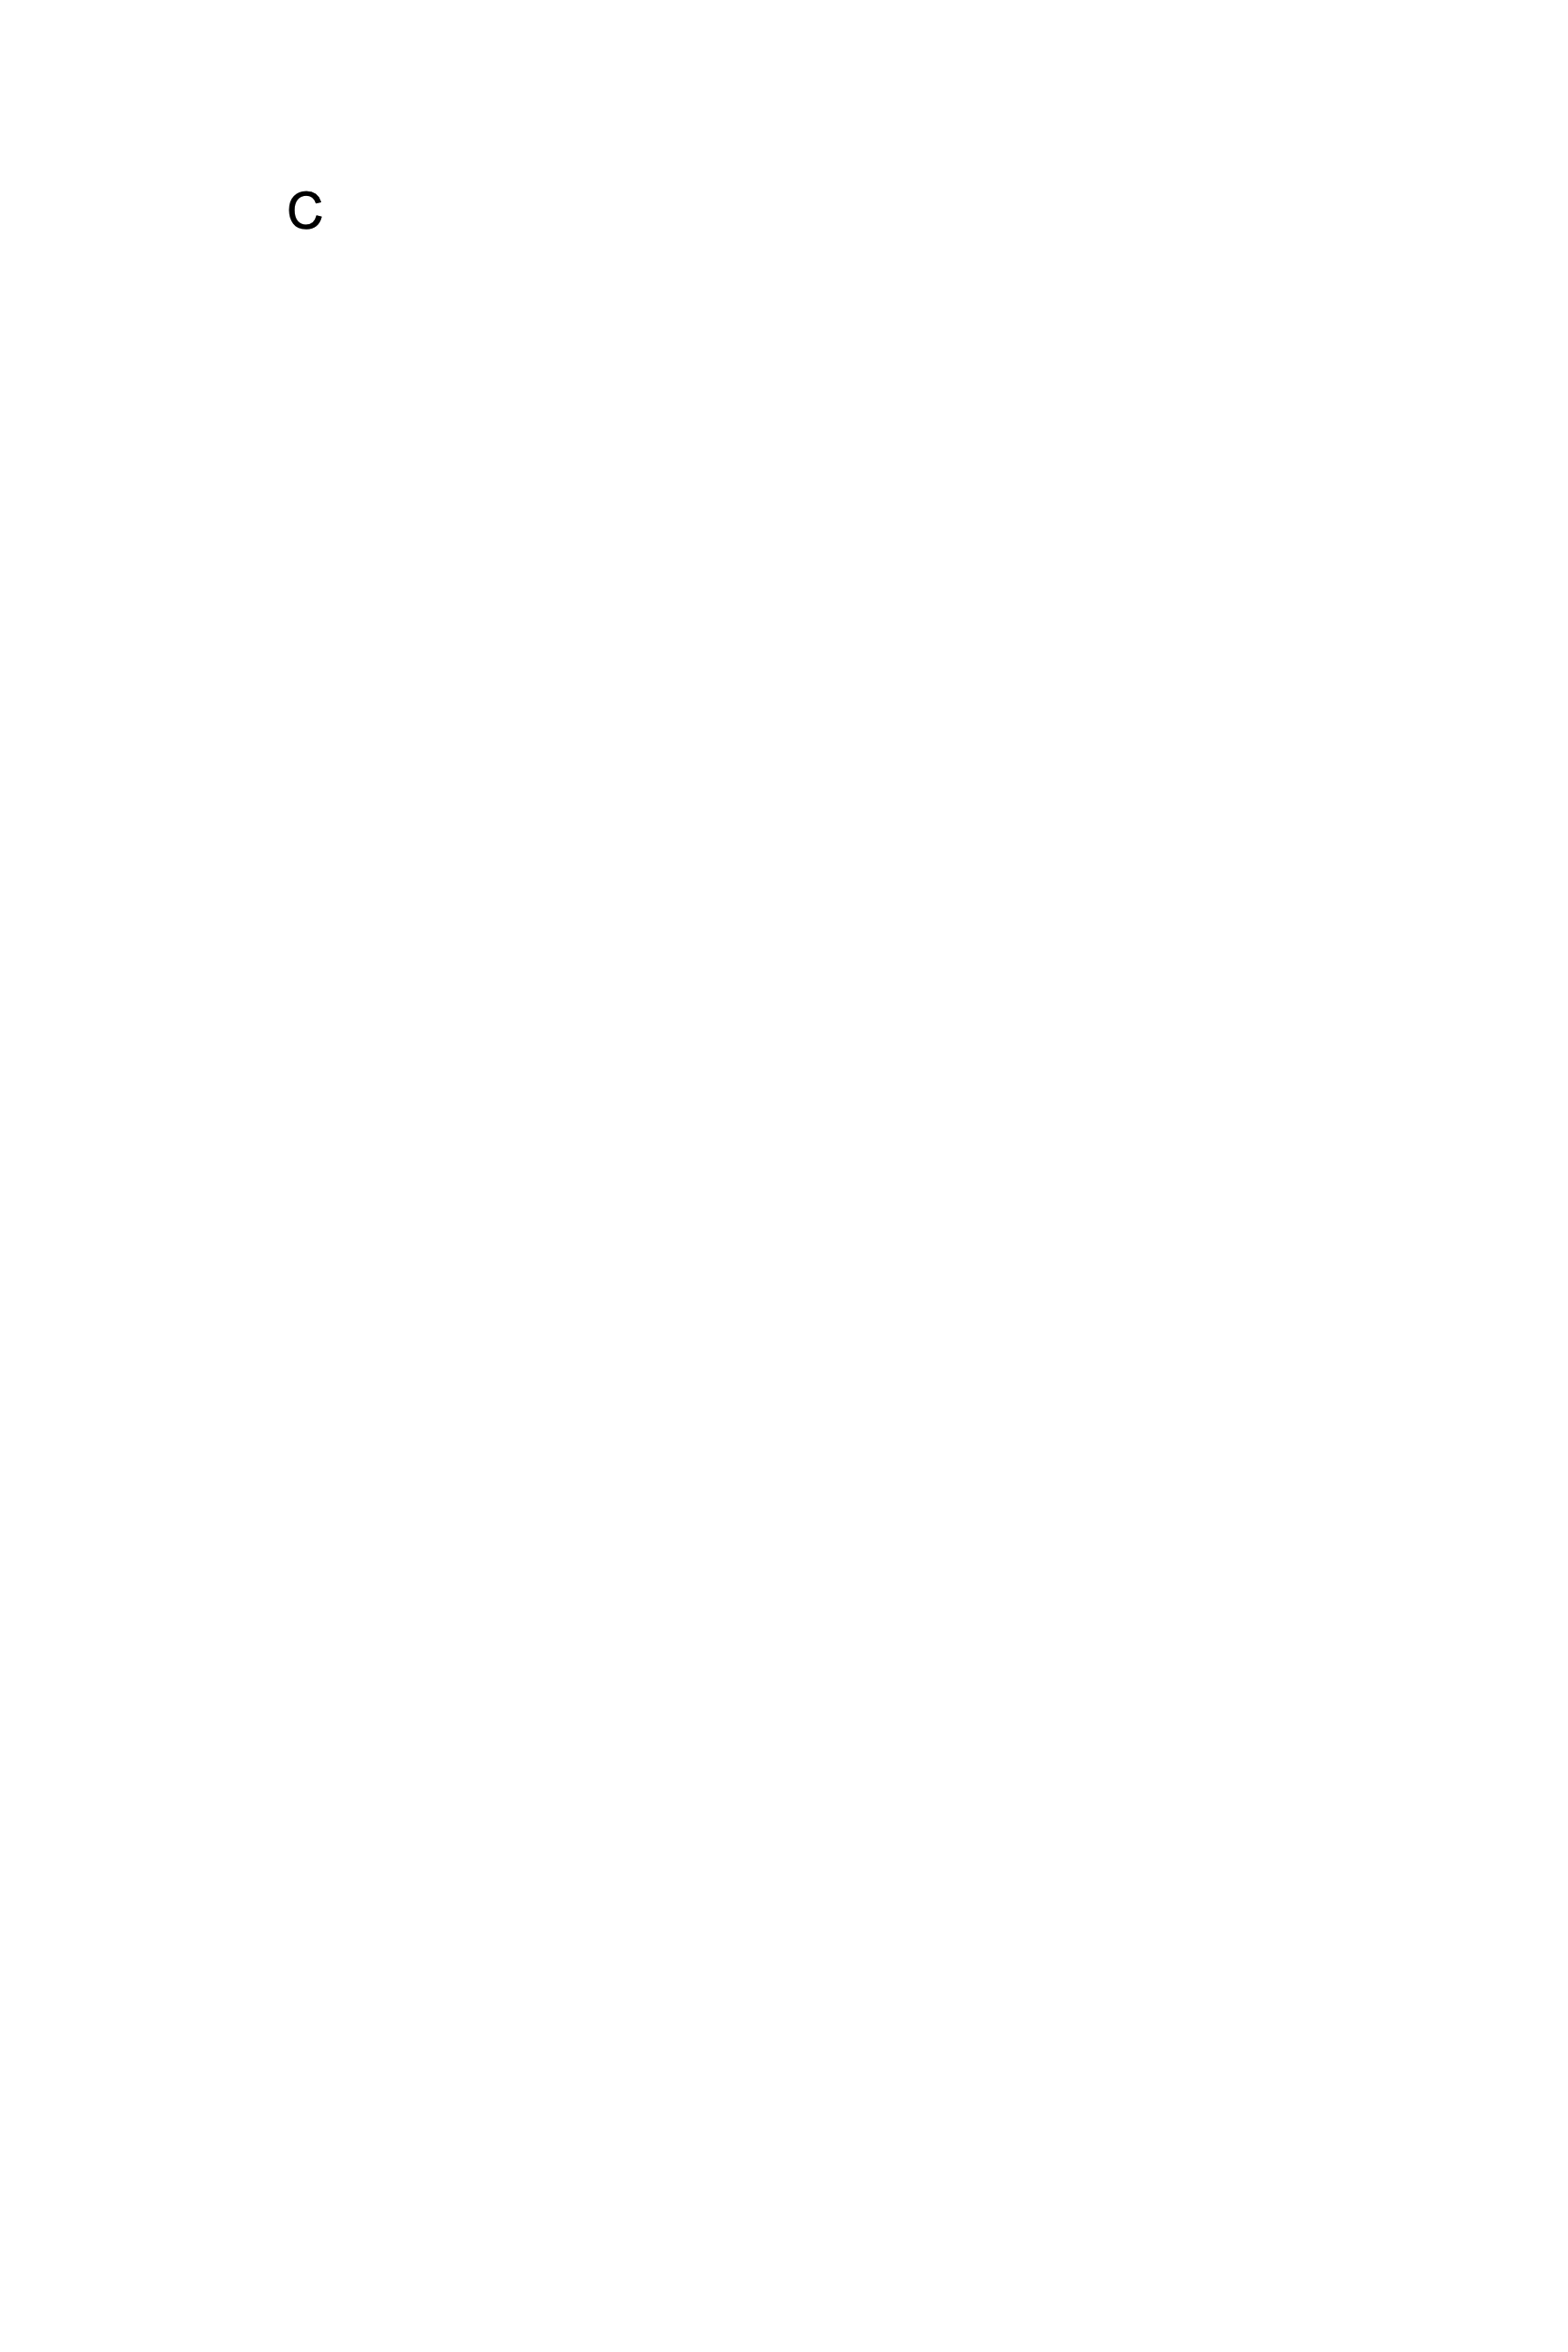


**Figure S2:** Frequency histograms of (a) log predator speed and (b) log predator turning speed. (c) Log turning speed versus log speed for all predators. We use the projection of a predator’s instantaneous speed and turning speed onto the arrow in in (c) to label the predator as ‘active’ (red, top right) or ‘inactive’ (blue, bottom left) at a given point in time.


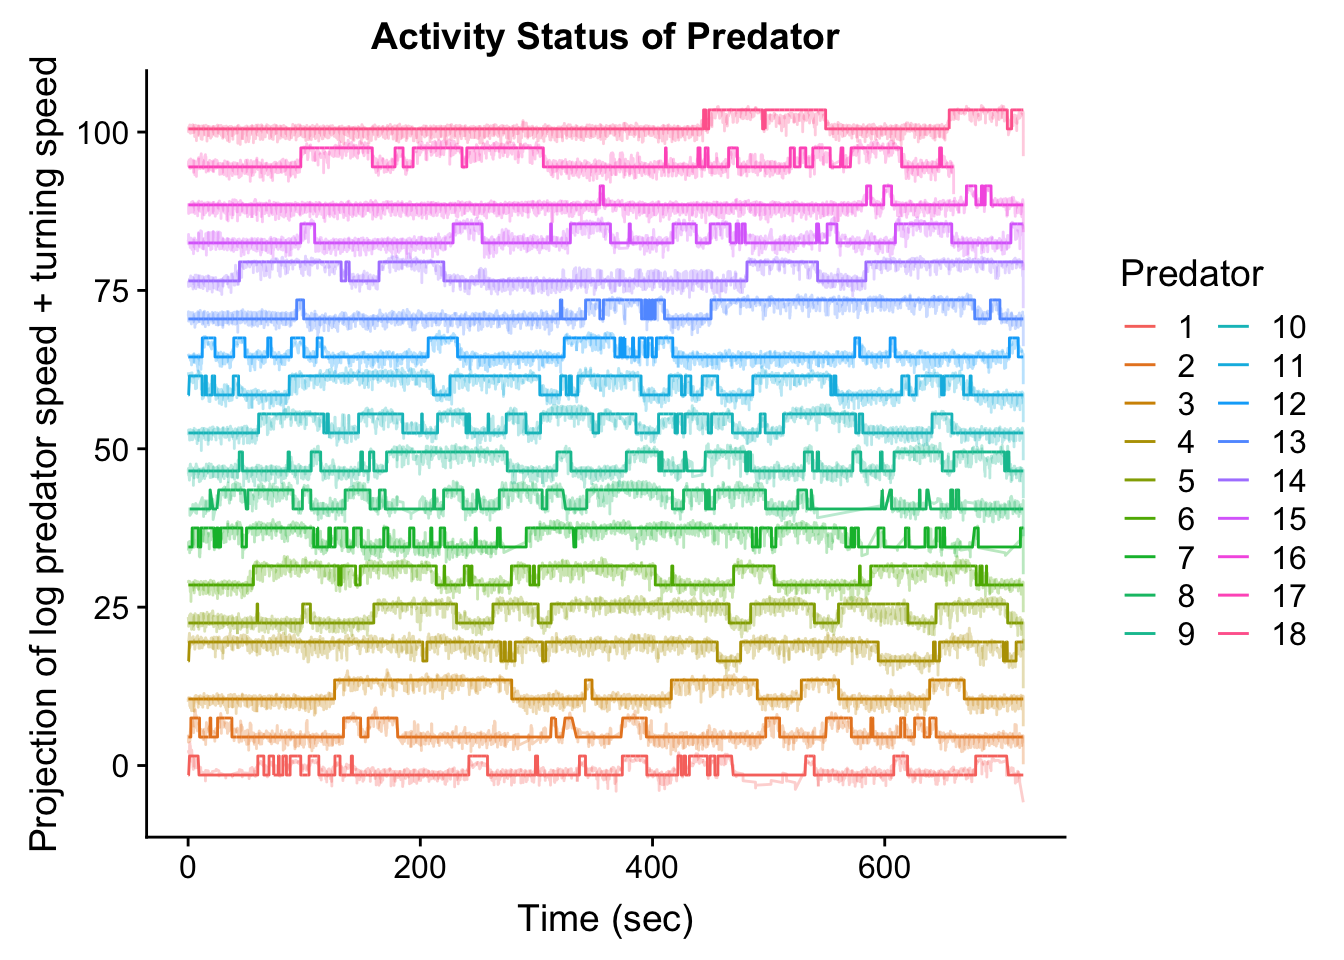


**Figure S3:** Labels of time periods of activity and inactivity for each of the 18 predator fish. The projection of a predator’s speed and turning speed along the line joining the centroids of the active and inactive state (denoted by an arrow in Fig. S2c) is shown as the noisier, faint signal on each line. The solid, binary indicator of ‘active’ vs. ‘inactive’ state for each predator is shown on top (after filtering). Each predator’s line is offset vertically from the previous one so that they are all visible.
